# Supplementary material
Source: PubMed Central journal article supplement (PMC4248817)
Supplement: JB.02070-14_zjb999093355so1.pdf [file JB.02070-14_zjb999093355so1.pdf]

Supplemental material:

**Hydrogen Formation and its Regulation in *Ruminococcus albus*: Involvement of an Electron-Bifurcating [FeFe]-Hydrogenase, of a Non Electron-bifurcating [FeFe]-hydrogenase and of a Putative Hydrogen-Sensing [FeFe]-Hydrogenase**

Yanning Zheng,<sup>a</sup> Jörg Kahnt,<sup>a</sup> In Hyuk Kwon,<sup>b</sup> Roderick I. Mackie,<sup>b</sup> and Rudolf K. Thauer<sup>a</sup>

Max Planck Institute for Terrestrial Microbiology, Marburg, Germany<sup>a</sup>; Department of Animal Sciences, Institute for Genomic Biology, University of Illinois at Urbana-Champaign, Urbana, Illinois, USA<sup>b</sup>

**Running title:** Hydrogenases in *Ruminococcus albus*

**Keywords:** Electron bifurcation, [FeFe]-hydrogenases, regulatory hydrogenase, ferredoxin, PAS domain, H<sub>2</sub>-sensing [FeFe]-hydrogenase, H<sub>2</sub>-formation, *Ruminococcus albus*, interspecies hydrogen transfer

**Corresponding Author.** Mailing address: Max Planck Institute for Terrestrial Microbiology, Karl-von-Frisch-Strasse 10, D-35043

Marburg, Germany. Phone: 49 6421 178 101. Fax: 49 6421 178 109. E-mail: [thauer@mpi-marburg.mpg.de](mailto:thauer@mpi-marburg.mpg.de).

**TABLE S1** Primers used for transcriptional analysis of genes *hydB*, *hydA2*, and *hydS* (Fig. 2) and co-transcriptional analysis of the rumal\_3398-3408 gene cluster (Fig. 5) in *R. albus* 7.

| Primer                | Sequence (5'→3')       | Application                                                                                                                                                          |
|-----------------------|------------------------|----------------------------------------------------------------------------------------------------------------------------------------------------------------------|
| <i>hydB</i> -forward  | AAGGAAACAGGCTACCGCAAG  | Amplification of a 1,459 bp intragenic region of <i>hydB</i>                                                                                                         |
| <i>hydB</i> -reverse  | GATCCTCCATCTCGCCCTTG   |                                                                                                                                                                      |
| <i>hydA2</i> -forward | CGGCAGGATATGAGGTCACGG  | Amplification of a 532 bp intragenic region of <i>hydA2</i>                                                                                                          |
| <i>hydA2</i> -reverse | CACAGGAACATGGCAGGAGTTC |                                                                                                                                                                      |
| <i>hydS</i> -forward  | TAATCGCGTGGGTGTGACTGTC | Amplification of a 954 bp intragenic region of <i>hydS</i>                                                                                                           |
| <i>hydS</i> -reverse  | GGCAGCAGGACGATATCACAAC |                                                                                                                                                                      |
| 3399-forward          | GAGCGTATGTACCGTCAGGG   | Amplification of a 1,433 bp intergenic region between <i>lysR</i> and <i>rstR</i>                                                                                    |
| 3400-reverse          | CCAGTGAAAGCGCCAGATTC   |                                                                                                                                                                      |
| 3400-forward          | TTGTTATTGTCGGTGCGGGA   | Amplification of a 1,979 bp intergenic region between <i>rstR</i> and the gene encoding bifunctional acetaldehyde/ethanol dehydrogenase                              |
| 3401-reverse          | ATAGCCTTTACGCCCTCCAC   |                                                                                                                                                                      |
| 3401-forward          | TTCATGGGGTGGAAACTCGG   | Amplification of a 2,164 bp intergenic region between the gene encoding bifunctional acetaldehyde/ethanol dehydrogenase and the gene encoding Ser/Thr protein kinase |
| 3402-reverse          | ACGCTCTTTAGCATTGCCCT   |                                                                                                                                                                      |
| 3402-forward          | CGGTAAGACCCTTGACACAGA  | Amplification of a 2,238 bp intergenic region between Ser/Thr protein kinase gene and <i>hydS</i>                                                                    |
| 3405-reverse          | TTTCAGGAAAGGCAGGCACA   |                                                                                                                                                                      |
| 3405-forward          | ATCTTCTGCCCATGCTTGCT   | Amplification of a 1,871 bp intergenic region between <i>hydS</i> and the gene encoding Ser/Thr protein phosphatase                                                  |
| 3406-reverse          | CGGATAACGCAGGCAGTAGT   |                                                                                                                                                                      |

|               |                         |                                                                                                                      |
|---------------|-------------------------|----------------------------------------------------------------------------------------------------------------------|
| 3406-forward  | ATGTTCCGGTGAGGGGAGTTG   | Amplification of a 2,010 bp intergenic region between the gene encoding Ser/Thr protein phosphatase and <i>hydA2</i> |
| 3407-reverse  | GGCTGTCAAAAAGTGCCTGG    |                                                                                                                      |
| 3407-forward  | ATGTATGTCCCAGAGGGGCT    | Amplification of a 1,649 bp intergenic region between <i>hydA2</i> and <i>rumal_3408</i>                             |
| 3408-reverse  | AACAAGCAGAGACGGCACAA    |                                                                                                                      |
| 3408-forward  | CATTTACCGATTTCTATCAGCCG | Amplification of a 2,153 bp intergenic region between <i>rumal_3408</i> and <i>rumal_3409</i>                        |
| 3409- reverse | ATAGCATAGCACCGCAGCTT    |                                                                                                                      |

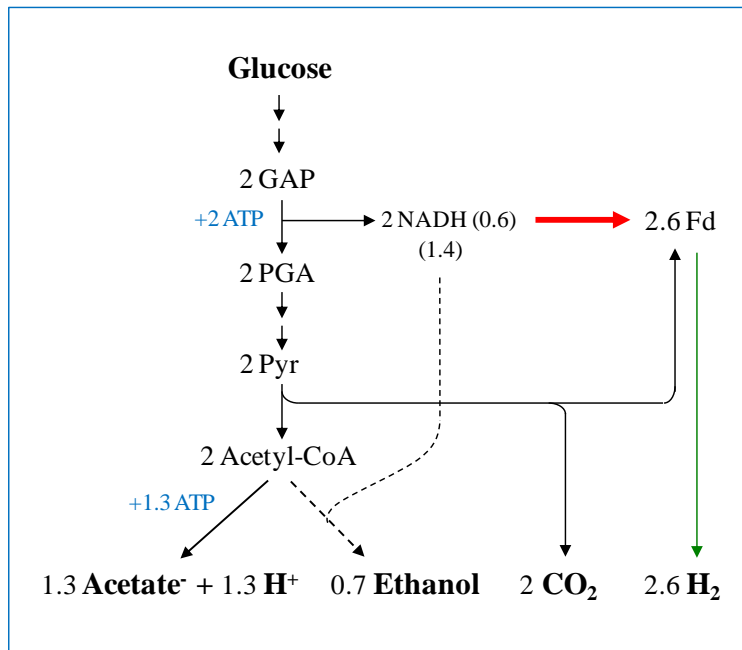

**FIG S1** Fermentation scheme of *R. albus* growing in batch culture on glucose as proposed in 1977 by Thauer *et al.* (1). It assumes a reduction of ferredoxin with NADH (red arrow), which is thermodynamically only feasible if coupled to an exergonic reaction. The corrected fermentation scheme is shown in Fig. 6. G-6-P, glucose-6-phosphate; GAP, glyceraldehyde-3-phosphate; PGA, phosphoglycerate; Pyr, pyruvate.

| Canonical<br>H-cluster<br>sequences | Segment 1 |          |          |          |          |          |          | Segment 2 |          |   |          |          |          |          | Segment 3 |          |          |          |          |   |          |   |          |          |          |          |          |          |          |          |          |   |          |          |   |   |          |
|-------------------------------------|-----------|----------|----------|----------|----------|----------|----------|-----------|----------|---|----------|----------|----------|----------|-----------|----------|----------|----------|----------|---|----------|---|----------|----------|----------|----------|----------|----------|----------|----------|----------|---|----------|----------|---|---|----------|
|                                     | F         | T        | S        | C        | H        | G        | H        | L         | R        | D | A        | Q        | K        | K        | x         | E        | C        | V        | H        | S | M        | L | A        | T        |          |          |          |          |          |          |          |   |          |          |   |   |          |
|                                     | I         | T        | S        | C        | H        | A        | I        | I         | T        | D | A        | Q        | K        | K        | x         | E        | V        | V        | V        | Y | L        | V | A        | S        |          |          |          |          |          |          |          |   |          |          |   |   |          |
| Ra                                  | I         | <u>S</u> | <u>S</u> | <u>C</u> | <u>C</u> | <u>H</u> | <u>S</u> | -         | <u>V</u> | I | <u>G</u> | <u>P</u> | <u>C</u> | <u>V</u> | <u>S</u>  | <u>K</u> | <u>K</u> | <u>D</u> | <u>E</u> | I | <u>E</u> | - | <u>M</u> | <u>S</u> | <u>A</u> | <u>C</u> | <u>N</u> | <u>G</u> | <u>S</u> | <u>C</u> | <u>I</u> | - | <u>G</u> | <u>G</u> | - | - | <u>P</u> |
| Tm                                  | I         | <u>T</u> | <u>T</u> | <u>A</u> | <u>C</u> | <u>P</u> | <u>V</u> | -         | <u>V</u> | V | <u>G</u> | <u>P</u> | <u>C</u> | <u>I</u> | <u>A</u>  | <u>K</u> | <u>K</u> | <u>S</u> | <u>E</u> | I | <u>E</u> | - | <u>A</u> | <u>S</u> | <u>A</u> | <u>C</u> | <u>Y</u> | <u>G</u> | <u>S</u> | <u>C</u> | <u>L</u> | - | <u>N</u> | <u>G</u> | - | - | <u>P</u> |
| Ta                                  | I         | <u>S</u> | <u>T</u> | <u>C</u> | <u>C</u> | <u>H</u> | <u>S</u> | -         | <u>V</u> | I | <u>G</u> | <u>P</u> | <u>C</u> | <u>I</u> | <u>S</u>  | <u>K</u> | <u>K</u> | <u>D</u> | <u>E</u> | I | <u>E</u> | - | <u>M</u> | <u>S</u> | <u>A</u> | <u>C</u> | <u>T</u> | <u>G</u> | <u>S</u> | <u>C</u> | <u>I</u> | - | <u>G</u> | <u>G</u> | - | - | <u>P</u> |
| Em                                  | I         | <u>S</u> | <u>S</u> | <u>S</u> | <u>C</u> | <u>H</u> | <u>S</u> | -         | <u>V</u> | I | <u>G</u> | <u>P</u> | <u>C</u> | <u>V</u> | <u>S</u>  | <u>K</u> | <u>K</u> | <u>D</u> | <u>E</u> | I | <u>E</u> | - | <u>M</u> | <u>S</u> | <u>A</u> | <u>C</u> | <u>K</u> | <u>G</u> | <u>S</u> | <u>C</u> | <u>I</u> | - | <u>G</u> | <u>G</u> | - | - | <u>P</u> |
| Cs                                  | I         | <u>T</u> | <u>S</u> | <u>C</u> | <u>C</u> | <u>H</u> | <u>S</u> | -         | <u>V</u> | I | <u>G</u> | <u>P</u> | <u>C</u> | <u>V</u> | <u>A</u>  | <u>K</u> | <u>K</u> | <u>D</u> | <u>E</u> | I | <u>E</u> | - | <u>M</u> | <u>S</u> | <u>A</u> | <u>C</u> | <u>A</u> | <u>G</u> | <u>S</u> | <u>C</u> | <u>I</u> | - | <u>G</u> | <u>G</u> | - | - | <u>P</u> |
| Ct                                  | I         | <u>S</u> | <u>S</u> | <u>C</u> | <u>C</u> | <u>H</u> | <u>T</u> | -         | <u>V</u> | I | <u>G</u> | <u>P</u> | <u>C</u> | <u>I</u> | <u>S</u>  | <u>K</u> | <u>K</u> | <u>D</u> | <u>E</u> | I | <u>E</u> | - | <u>M</u> | <u>S</u> | <u>A</u> | <u>C</u> | <u>R</u> | <u>G</u> | <u>S</u> | <u>C</u> | <u>I</u> | - | <u>N</u> | <u>G</u> | - | - | <u>P</u> |
| Cc                                  | I         | <u>T</u> | <u>S</u> | <u>C</u> | <u>C</u> | <u>S</u> | <u>S</u> | -         | <u>I</u> | I | <u>G</u> | <u>P</u> | <u>C</u> | <u>I</u> | <u>S</u>  | <u>K</u> | <u>K</u> | <u>E</u> | <u>E</u> | I | <u>E</u> | - | <u>M</u> | <u>S</u> | <u>S</u> | <u>C</u> | <u>K</u> | <u>G</u> | <u>G</u> | <u>C</u> | <u>L</u> | - | <u>G</u> | <u>G</u> | - | - | <u>P</u> |
| Cj                                  | I         | <u>T</u> | <u>S</u> | <u>C</u> | <u>C</u> | <u>S</u> | <u>S</u> | -         | <u>I</u> | I | <u>G</u> | <u>P</u> | <u>C</u> | <u>I</u> | <u>S</u>  | <u>K</u> | <u>K</u> | <u>E</u> | <u>E</u> | I | <u>E</u> | - | <u>M</u> | <u>S</u> | <u>S</u> | <u>C</u> | <u>K</u> | <u>G</u> | <u>G</u> | <u>C</u> | <u>L</u> | - | <u>G</u> | <u>G</u> | - | - | <u>P</u> |
| Cp                                  | I         | <u>T</u> | <u>S</u> | <u>C</u> | <u>C</u> | <u>S</u> | <u>S</u> | -         | <u>I</u> | I | <u>G</u> | <u>P</u> | <u>C</u> | <u>I</u> | <u>S</u>  | <u>K</u> | <u>K</u> | <u>E</u> | <u>E</u> | I | <u>E</u> | - | <u>M</u> | <u>S</u> | <u>S</u> | <u>C</u> | <u>K</u> | <u>G</u> | <u>G</u> | <u>C</u> | <u>L</u> | - | <u>G</u> | <u>G</u> | - | - | <u>P</u> |
| Pc                                  | <u>V</u>  | <u>S</u> | <u>T</u> | <u>C</u> | <u>C</u> | <u>H</u> | <u>T</u> | -         | <u>V</u> | I | <u>G</u> | <u>P</u> | <u>C</u> | <u>I</u> | <u>S</u>  | <u>K</u> | <u>K</u> | <u>D</u> | <u>E</u> | I | <u>E</u> | - | <u>M</u> | <u>S</u> | <u>A</u> | <u>C</u> | <u>P</u> | <u>G</u> | <u>S</u> | <u>C</u> | <u>I</u> | - | <u>G</u> | <u>G</u> | - | - | <u>P</u> |
| Ac                                  | I         | <u>S</u> | <u>S</u> | <u>C</u> | <u>C</u> | <u>H</u> | <u>S</u> | -         | <u>V</u> | I | <u>G</u> | <u>P</u> | <u>C</u> | <u>I</u> | <u>S</u>  | <u>K</u> | <u>K</u> | <u>E</u> | <u>E</u> | I | <u>E</u> | - | <u>M</u> | <u>S</u> | <u>A</u> | <u>C</u> | <u>R</u> | <u>G</u> | <u>S</u> | <u>C</u> | <u>I</u> | - | <u>N</u> | <u>G</u> | - | - | <u>P</u> |
| Cb                                  | I         | <u>T</u> | <u>T</u> | <u>S</u> | <u>C</u> | <u>P</u> | <u>S</u> | -         | <u>A</u> | I | <u>G</u> | <u>P</u> | <u>C</u> | <u>T</u> | <u>S</u>  | <u>K</u> | <u>K</u> | <u>I</u> | <u>E</u> | L | <u>E</u> | - | <u>V</u> | <u>N</u> | <u>V</u> | <u>C</u> | <u>K</u> | <u>G</u> | <u>S</u> | <u>C</u> | <u>I</u> | - | <u>G</u> | <u>G</u> | - | - | <u>P</u> |
| Bp                                  | I         | <u>T</u> | <u>S</u> | <u>V</u> | <u>C</u> | <u>P</u> | <u>A</u> | -         | <u>V</u> | I | <u>S</u> | <u>P</u> | <u>C</u> | <u>I</u> | <u>S</u>  | <u>P</u> | <u>V</u> | <u>A</u> | <u>E</u> | L | <u>E</u> | - | <u>L</u> | <u>N</u> | <u>I</u> | <u>C</u> | <u>E</u> | <u>G</u> | <u>G</u> | <u>C</u> | <u>I</u> | - | <u>G</u> | <u>G</u> | - | - | <u>P</u> |
| Fb                                  | I         | <u>S</u> | <u>S</u> | <u>C</u> | <u>C</u> | <u>H</u> | <u>S</u> | -         | <u>V</u> | I | <u>G</u> | <u>P</u> | <u>C</u> | <u>V</u> | <u>A</u>  | <u>K</u> | <u>K</u> | <u>D</u> | <u>E</u> | I | <u>E</u> | - | <u>M</u> | <u>S</u> | <u>S</u> | <u>C</u> | <u>V</u> | <u>G</u> | <u>S</u> | <u>C</u> | <u>V</u> | - | <u>G</u> | <u>G</u> | - | - | <u>P</u> |
| Rc                                  | I         | <u>S</u> | <u>S</u> | <u>C</u> | <u>C</u> | <u>H</u> | <u>S</u> | -         | <u>V</u> | I | <u>G</u> | <u>P</u> | <u>C</u> | <u>L</u> | <u>S</u>  | <u>K</u> | <u>K</u> | <u>D</u> | <u>E</u> | I | <u>E</u> | - | <u>M</u> | <u>S</u> | <u>A</u> | <u>C</u> | <u>A</u> | <u>G</u> | <u>S</u> | <u>C</u> | <u>I</u> | - | <u>G</u> | <u>G</u> | - | - | <u>P</u> |
| Es                                  | I         | <u>S</u> | <u>S</u> | <u>C</u> | <u>C</u> | <u>H</u> | <u>T</u> | -         | <u>V</u> | I | <u>G</u> | <u>P</u> | <u>C</u> | <u>L</u> | <u>S</u>  | <u>K</u> | <u>K</u> | <u>A</u> | <u>E</u> | I | <u>E</u> | - | <u>M</u> | <u>S</u> | <u>A</u> | <u>C</u> | <u>V</u> | <u>N</u> | <u>S</u> | <u>C</u> | <u>I</u> | - | <u>G</u> | <u>G</u> | - | - | <u>P</u> |
| Tc                                  | I         | <u>S</u> | <u>A</u> | <u>C</u> | <u>C</u> | <u>P</u> | <u>V</u> | -         | <u>V</u> | A | <u>G</u> | <u>P</u> | <u>C</u> | <u>I</u> | <u>A</u>  | <u>K</u> | <u>F</u> | <u>A</u> | <u>E</u> | V | <u>E</u> | - | <u>A</u> | <u>L</u> | <u>A</u> | <u>C</u> | <u>T</u> | <u>G</u> | <u>G</u> | <u>C</u> | <u>I</u> | - | <u>N</u> | <u>G</u> | - | - | <u>P</u> |
| Lb                                  | I         | <u>S</u> | <u>S</u> | <u>C</u> | <u>C</u> | <u>H</u> | <u>S</u> | -         | <u>V</u> | I | <u>G</u> | <u>P</u> | <u>C</u> | <u>V</u> | <u>S</u>  | <u>K</u> | <u>K</u> | <u>D</u> | <u>E</u> | I | <u>E</u> | - | <u>M</u> | <u>S</u> | <u>A</u> | <u>C</u> | <u>V</u> | <u>G</u> | <u>S</u> | <u>C</u> | <u>V</u> | - | <u>G</u> | <u>G</u> | - | - | <u>P</u> |
| Tw                                  | I         | <u>T</u> | <u>T</u> | <u>A</u> | <u>C</u> | <u>P</u> | <u>V</u> | -         | <u>V</u> | I | <u>G</u> | <u>P</u> | <u>C</u> | <u>I</u> | <u>A</u>  | <u>K</u> | <u>K</u> | <u>A</u> | <u>E</u> | F | <u>E</u> | - | <u>M</u> | <u>M</u> | <u>A</u> | <u>C</u> | <u>R</u> | <u>G</u> | <u>G</u> | <u>C</u> | <u>I</u> | - | <u>N</u> | <u>G</u> | - | - | <u>P</u> |
| Ts                                  | I         | <u>T</u> | <u>T</u> | <u>S</u> | <u>C</u> | <u>P</u> | <u>S</u> | -         | <u>V</u> | I | <u>G</u> | <u>P</u> | <u>C</u> | <u>L</u> | <u>A</u>  | <u>K</u> | <u>K</u> | <u>A</u> | <u>E</u> | I | <u>E</u> | - | <u>A</u> | <u>N</u> | <u>A</u> | <u>C</u> | <u>D</u> | <u>G</u> | <u>G</u> | <u>C</u> | <u>I</u> | - | <u>N</u> | <u>G</u> | - | - | <u>P</u> |

**FIG S2** The three segments encompassing the four cysteine ligands (in red) involved in H-cluster iron binding in the putative H<sub>2</sub>-sensing [FeFe]-hydrogenase HydS of different bacteria (not complete). The consensus sequence in the three segments of metabolic [FeFe]-hydrogenases is based on the review by Vignais *et al.* in 2001 (2) and Lubitz *et al.* 2014 (3). Underlining indicates fully conserved residues; x indicates that more than four different residues are found at that position. Ra, *Ruminococcus albus*; Tm, *Thermotoga maritima*; Ta, *Treponema azotonutricium*; Em, *Elusimicrobium minutum*; Cs *Clostridium stercorarium*; Ct, *C. thermocellum*; Cc, *C. cellulolyticum*; Cj, *C. josui*; Cp, *C. papyrosolvans*; Pc, *Pseudoflavonifractor capillosus*; Ac, *Acetivibrio cellulolyticus*; Cb, *Clostridiaceae bacterium*; Bp, *Blautia producta*; Fb, *Firmicutes bacterium*; Rc, *Ruminococcus champanellensis*; Es, *Eubacterium siraeum*; Tc, *Thermosinus carboxydivorans*; Lb, *Lachnospiraceae bacterium*; Tw, *Thermoanaerobacter wiegelsii*; Ts, *Thermoanaerobacterium saccharolyticum*.

1. **Thauer RK, Jungermann K, Decker K.** 1977. Energy conservation in chemotropic anaerobic bacteria. *Bacteriol. Rev.* **41**:100-180.
2. **Vignais PM, Billoud B, Meyer J.** 2001. Classification and phylogeny of hydrogenases. *FEMS Microbiol. Rev.* **25**:455-501.
3. **Lubitz W, Ogata H, Rüdiger O, Reijerse E.** 2014. Hydrogenases. *Chem. Rev.* **114**:4081-4148.
